# Supplementary material for: Corinthian Currants Promote the Expression of Paraoxonase-1 and Enhance the Antioxidant Status in Serum and Brain of 5xFAD Mouse Model of Alzheimer’s Disease
Source: MDPI journal article supplement (doi:10.3390/biom14040426), 2024-04-01
Supplement: s1 [file s1]

# **Corinthian currants promote the expression of paraoxonase-1 and enhance the antioxidant status in serum and the brain of the 5xFAD mouse model of Alzheimer's disease**

**Dimitris Lymperopoulos <sup>1,2,†</sup>, Anastasia-Georgia Dedemadi <sup>1,3,†</sup>, Maria-Lydia Voulgari <sup>1,3</sup>, Eirini Georgiou <sup>1,3</sup>, Ioannis Dafnis <sup>1</sup>, Christina Mountaki <sup>1</sup>, Eirini A. Panagopoulou <sup>4</sup>, Michalis Karvelas <sup>5</sup>, Antonia Chiou <sup>4</sup>, Vaios T. Karathanos <sup>4</sup> and Angeliki Chroni <sup>1,\*</sup>**

<sup>1</sup> Institute of Biosciences and Applications, National Center for Scientific Research "Demokritos", Agia Paraskevi, 15341 Athens, Greece;

<sup>2</sup> Department of Biology, National and Kapodistrian University of Athens, Zografou, 15784 Athens, Greece

<sup>3</sup> Department of Chemistry, National and Kapodistrian University of Athens, Zografou, 15784 Athens, Greece

<sup>4</sup> Laboratory of Chemistry-Biochemistry-Physical Chemistry of Foods, Department of Dietetics and Nutrition, Harokopio University, 17676 Kallithea, Greece; chiou@hua.gr (A.C.); vkarath@hua.gr (V.T.K.)

<sup>5</sup> Research and Development Department, Agricultural Cooperatives' Union of Aeghion, 25100 Aeghion, Greece; mkarvelas@pesunion.gr

\* Correspondence: achroni@bio.demokritos.gr; Tel.: +30-210-6503626

† These authors contributed equally to this work.

## **SUPPLEMENTARY FIGURES**

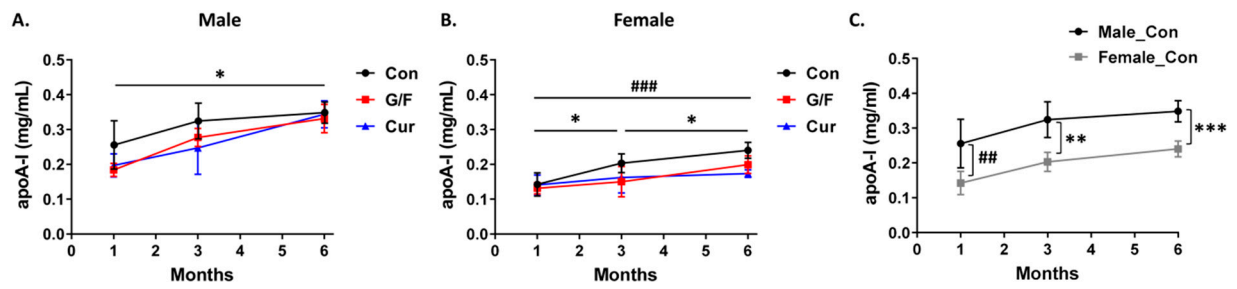

**Figure S1.** Serum apoA-I concentration in 5xFAD mice fed with the control diet, glucose/fructose-supplemented diet, and currant-supplemented diet. Panel (A) shows values for male mice, panel (B) shows values for female mice and panel (C) shows a comparison of apoA-I levels between male and female mice. Data are expressed as mean  $\pm$  SD (n = 6 males, 5 females per condition). \* $p$ <0.05, \*\* $p$ <0.005, \*\*\* $p$ <0.0001 for the indicated comparisons in mice fed the control diet.

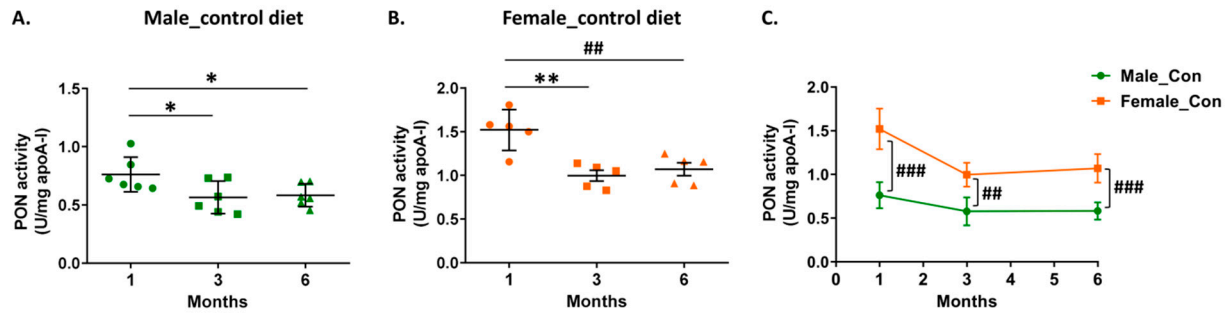

**Figure S2.** Effect of aging and sex on PON1 paraoxonase (PON) activity in serum of 5xFAD mice fed with the control diet. PON activity was normalized with apoA-I concentration and expressed as U/mg of apoA-I. Panel (A) shows values for male mice, panel (B) shows values for female mice and panel (C) shows a comparison of PON activity between male and female mice. Data are expressed as mean  $\pm$  SD ( $n = 6$  males, 5 females per condition). \* $p < 0.05$ , \*\* $p < 0.01$ , \*\*\* $p < 0.005$ , \*\*\*\* $p < 0.001$ .

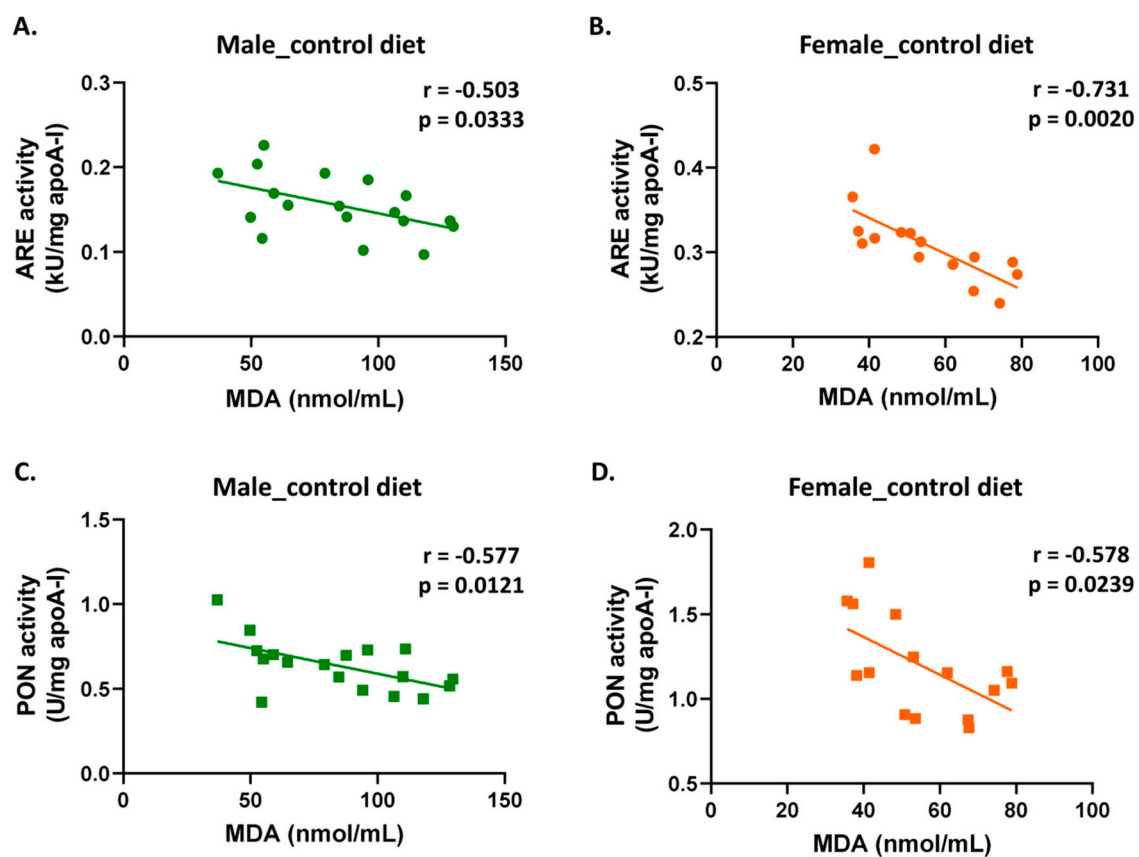

**Figure S3.** Correlation analysis between ARE or PON activity and MDA levels in serum of male and female 5xFAD mice fed with the control diet for 1, 3 and 6 months (control groups).

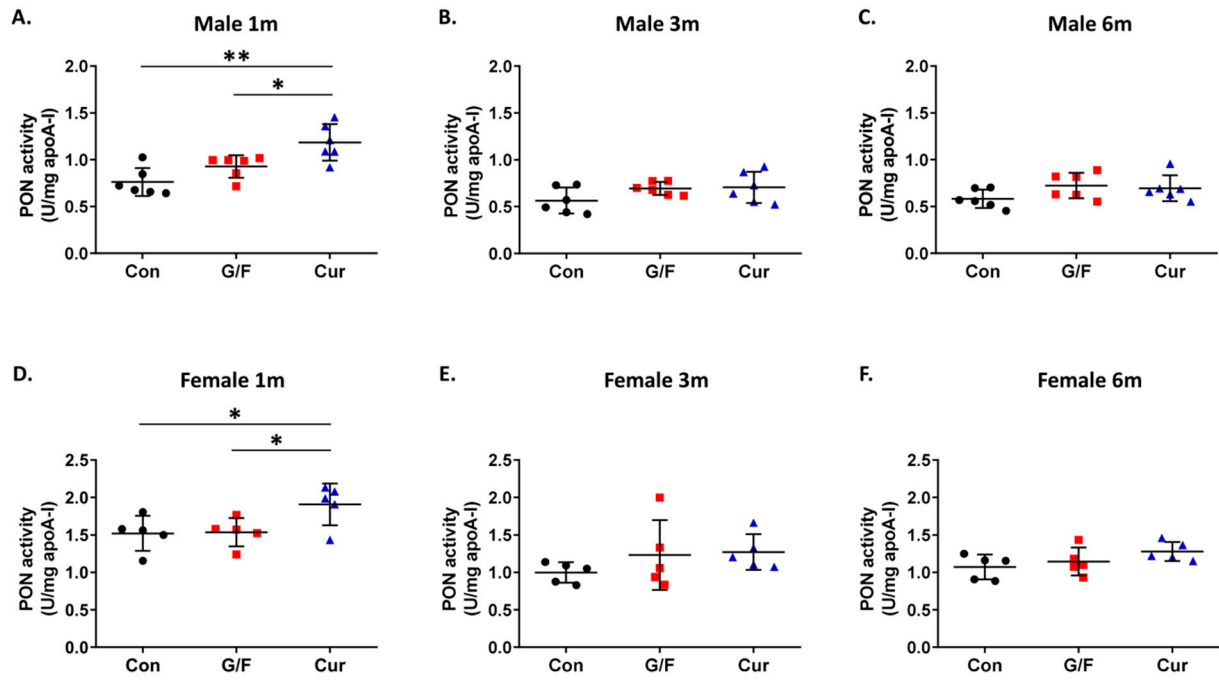

**Figure S4.** Time-dependent effect of currant diet on PON1 paraoxonase (PON) activity in serum of 5xFAD mice. PON activity was normalized with apoA-I concentration and expressed as U/mg of apoA-I. Panels (A-C) show values for male mice and panels (D-F) show values for female mice. Data are expressed as mean  $\pm$  SD ( $n = 6$  males, 5 females per condition). \* $p < 0.05$ , \*\* $p < 0.005$ .

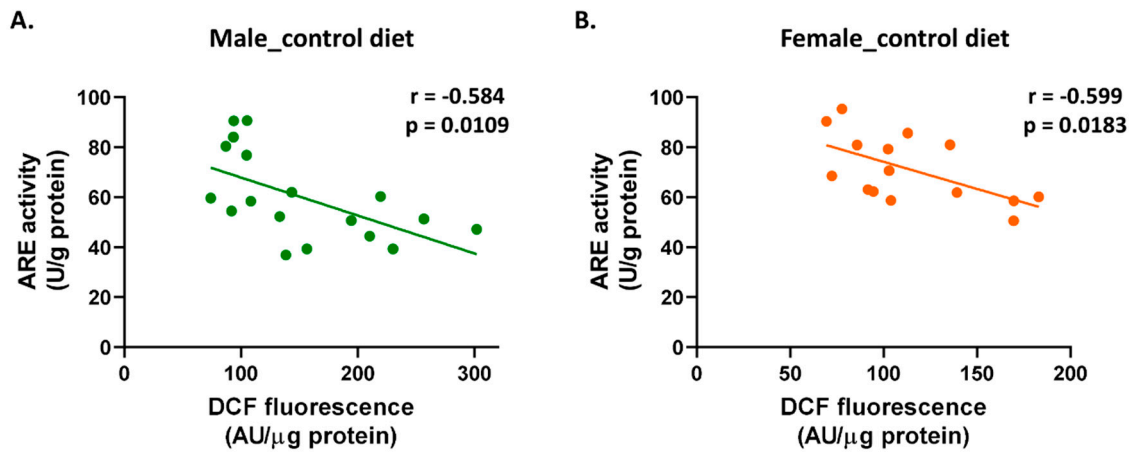

**Figure S5.** Correlation analysis between ARE activity and DCF fluorescence (indicative of free radical levels) in the cortical homogenate of male and female 5xFAD mice fed with the control diet for 1, 3 and 6 months (control groups).

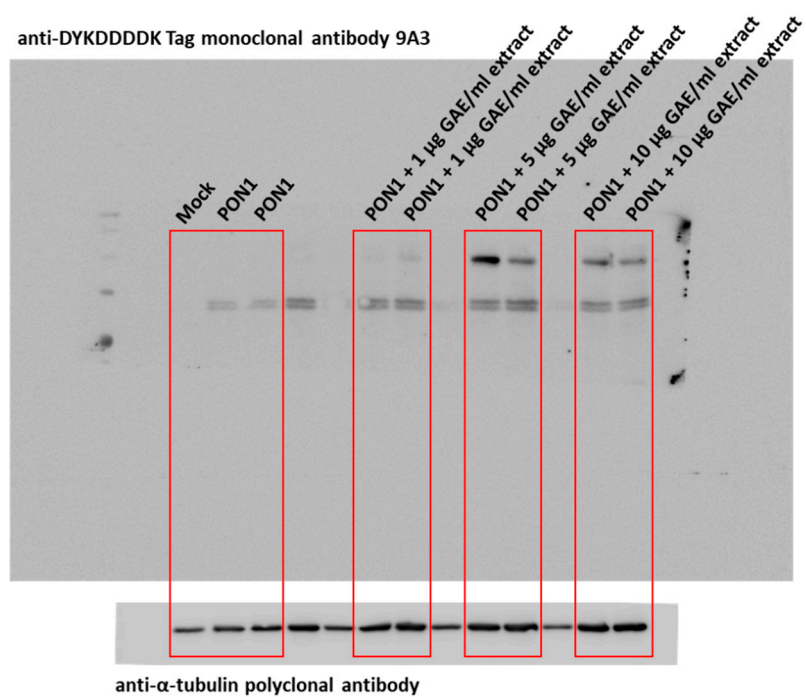

**Figure S6.** Uncropped immunoblots for PON1 and  $\alpha$ -tubulin. Red frames indicate the bands presented in Figure 10D.
